# Supplementary material
Source: publisher site journal article supplement (https://www.dovepress.com/article/558039)
Supplement: Supplementary file 1 [file 558039_Supplementary%20Information_1.docx]

Supplementary Information


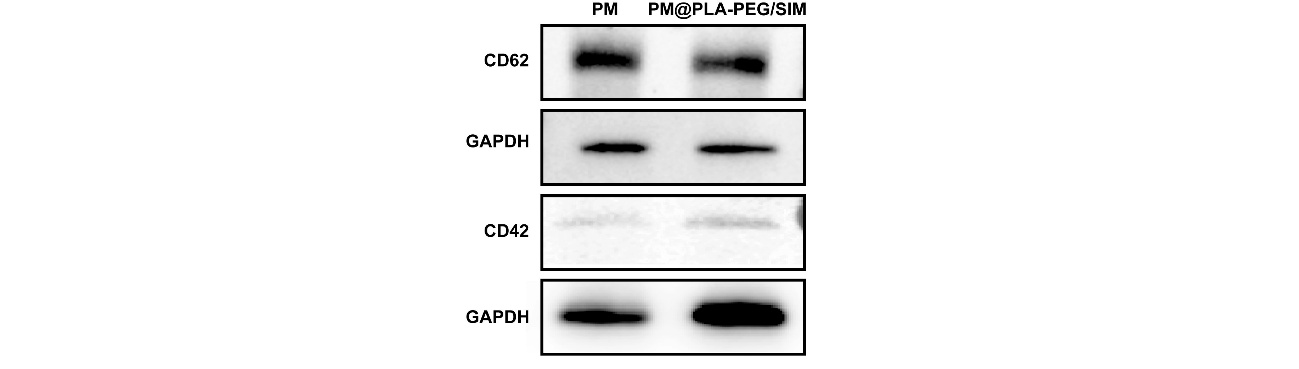


Figure S1 Western blot was used to detect CD62 and CD42 in PM and PM@PLA-PEG/SIM samples.


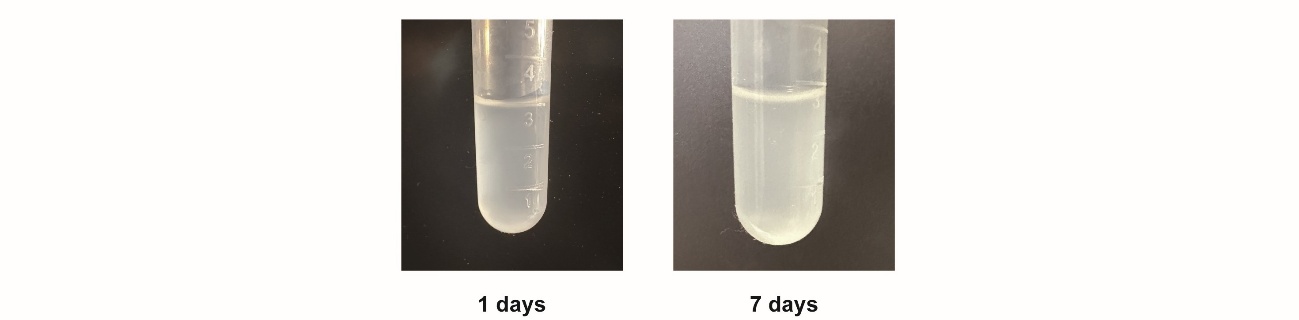
Figure S2 Intuitive pictures of PM@PLA-PEG/SIM on 1 and 7 days.


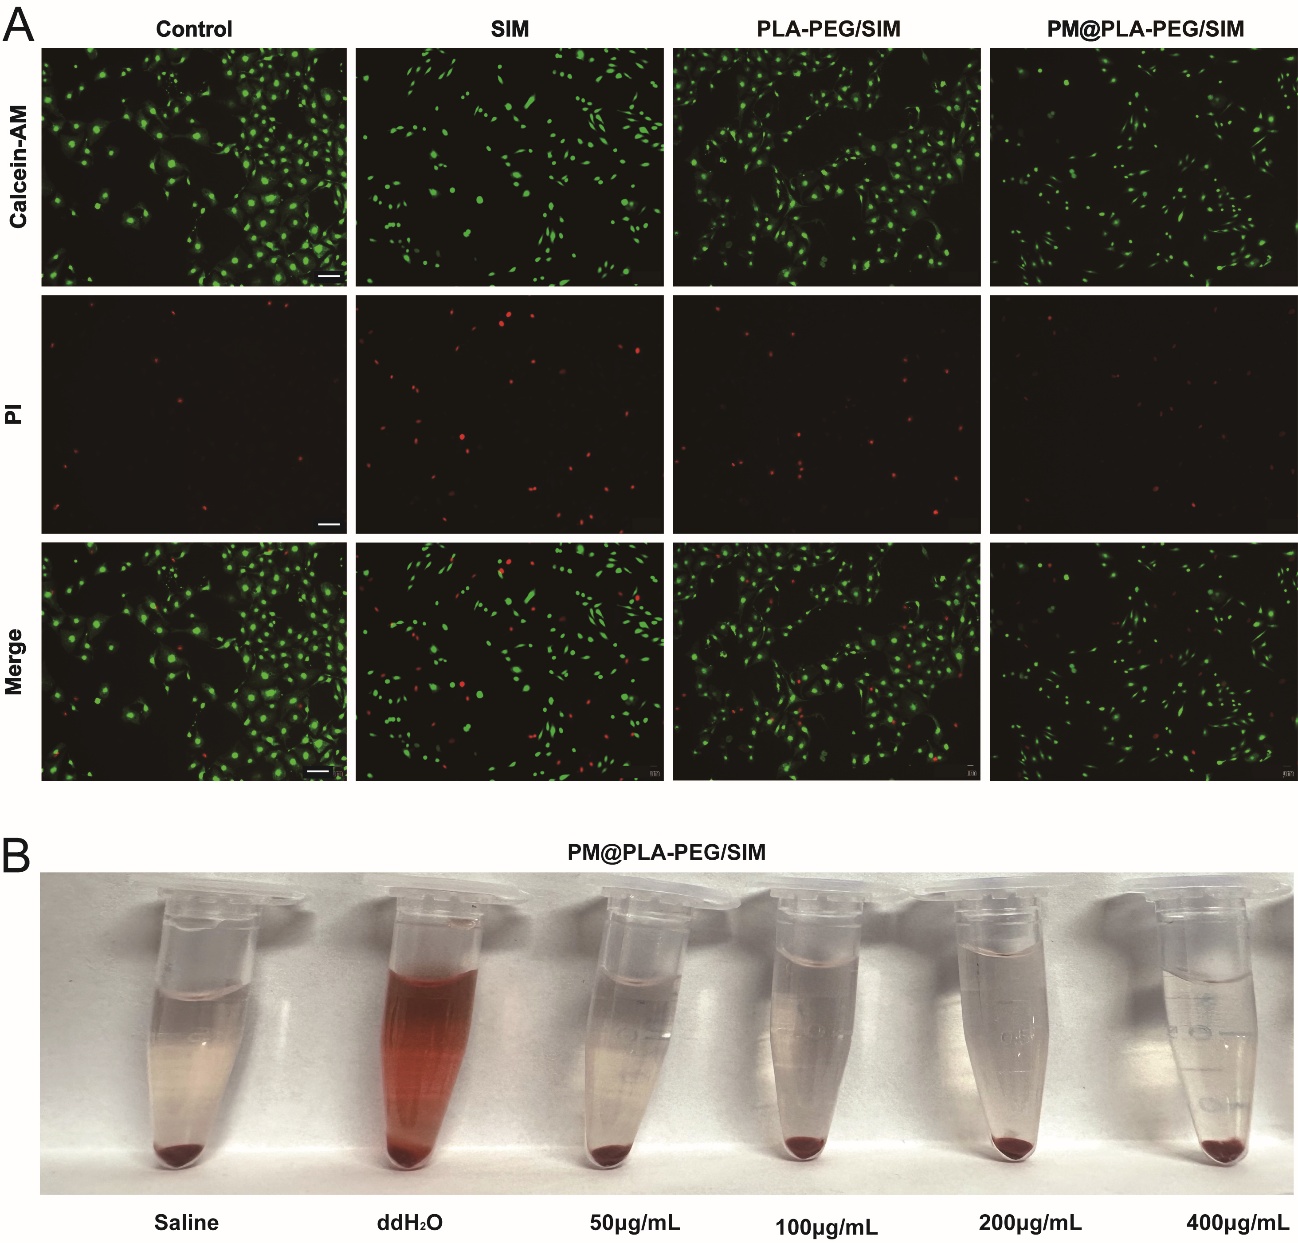


Figure S3Biological compatibility of PM@PLA-PEG/SIM.(**A**) Calcein-AM/PI staining of HUVECs. SIM at 16 μg/mL. Scale bar, 100 μm. (**B**)Hemolysis visualisation of PM@PLA-PEG/SIM.


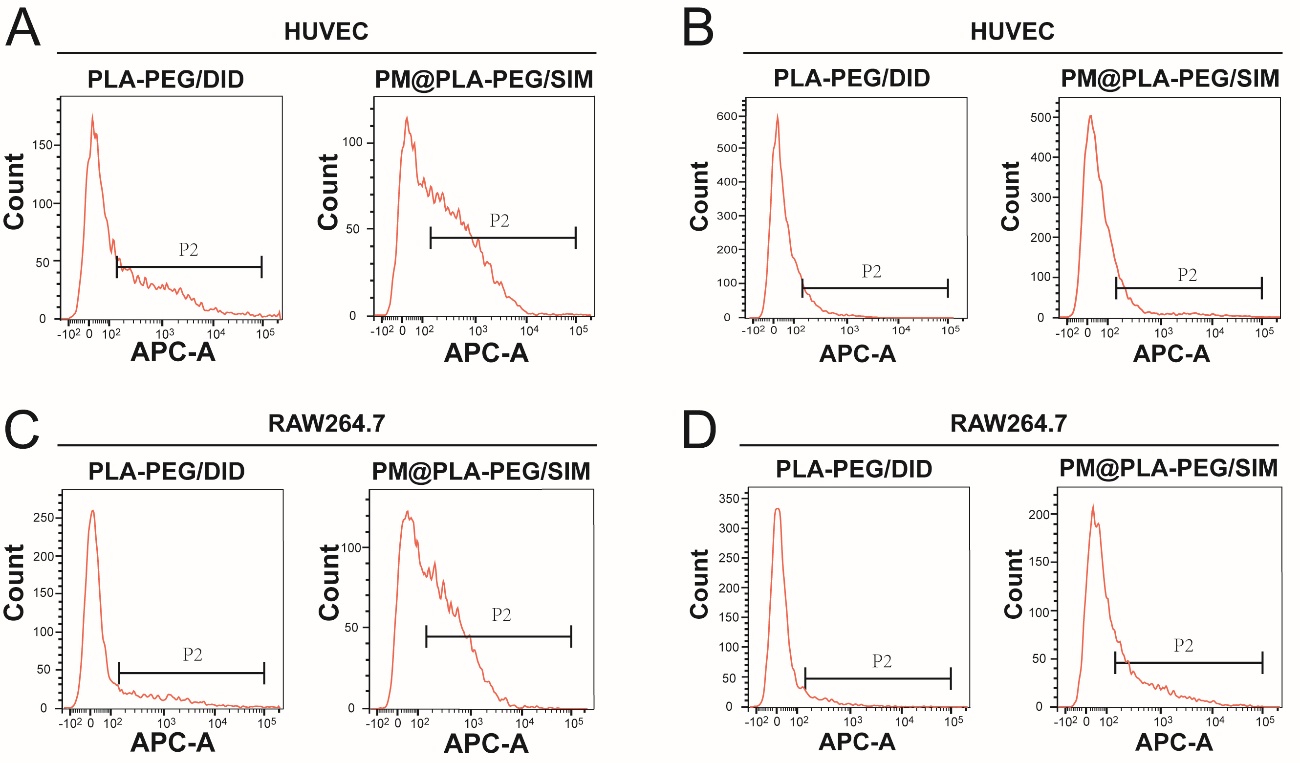


Figure S4 Uptake of PM@PLA-PEG/SIM by HUVECs and RAW264.7 cells. Uptake of PLA-PEG/DID and PM@PLA-PEG/DID by (**A-B**) HUVECs and (**C-D**) RAW264.7 cells without or with LPS activation, as determined by flow cytometry (P2, Positive cell).


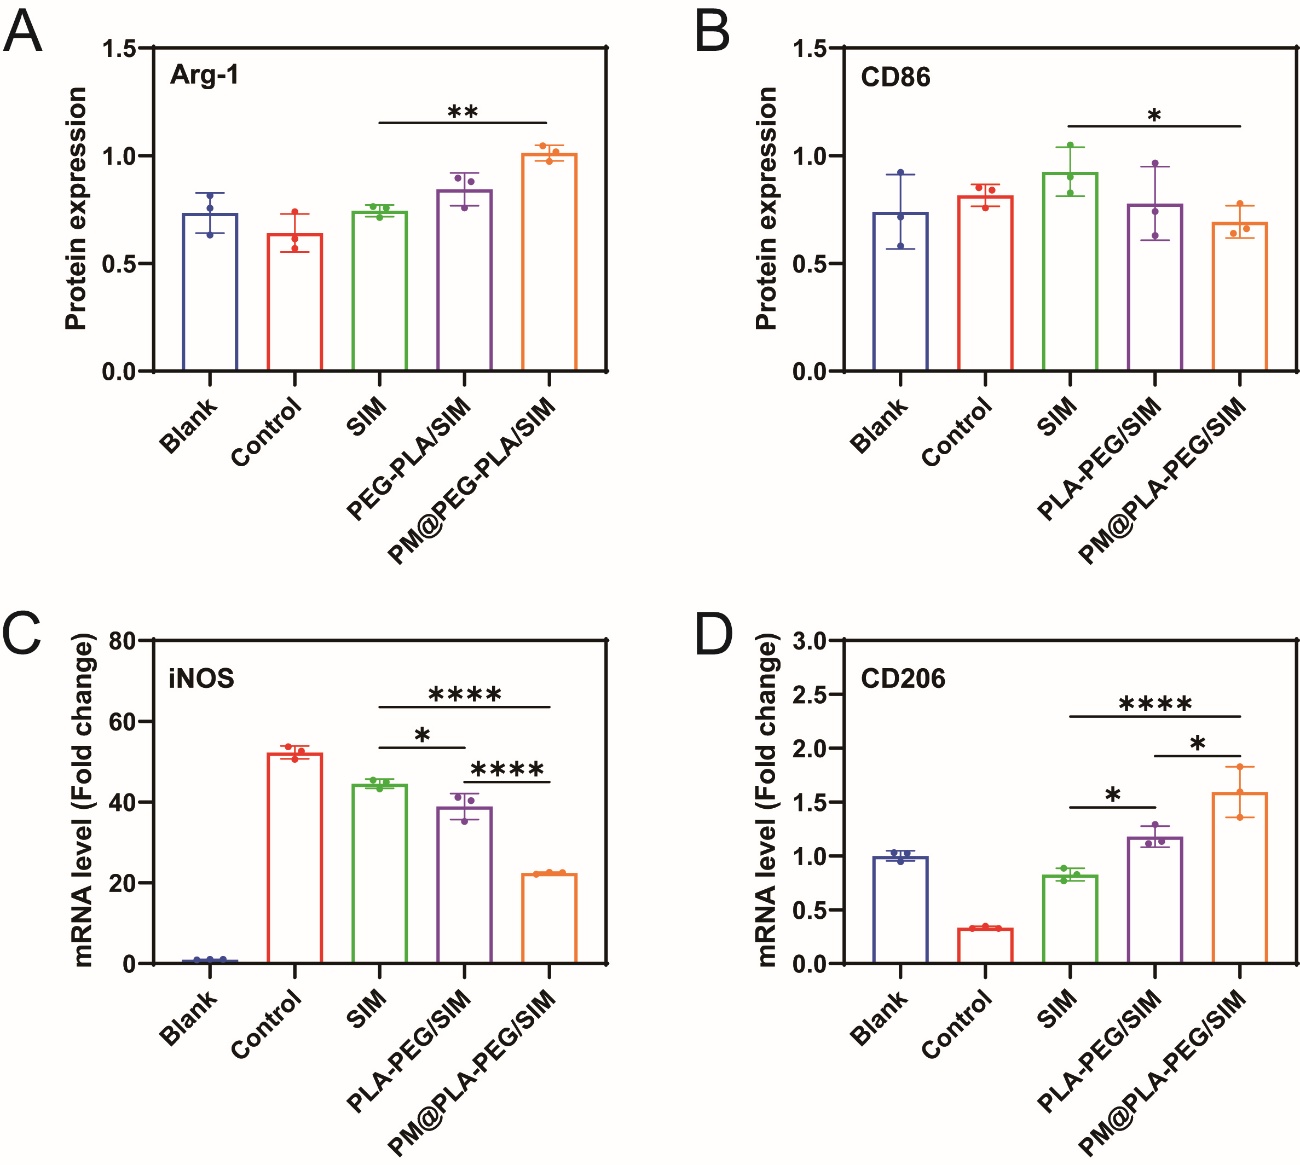


Figure S5 (**A-B**) Protein expression levels of CD86 and Arg-1. (**C-D**) Cells were treated with SIM, PLA-PEG/SIM, or PM@PLA-PEG/SIM following LPS stimulation. QRT-PCR analysis of inflammatory cytokine mRNA expression levels: iNOS and CD206. Data represent mean ± SD (n = 3, *P < 0.05, **P < 0.01, ****P < 0.0001).


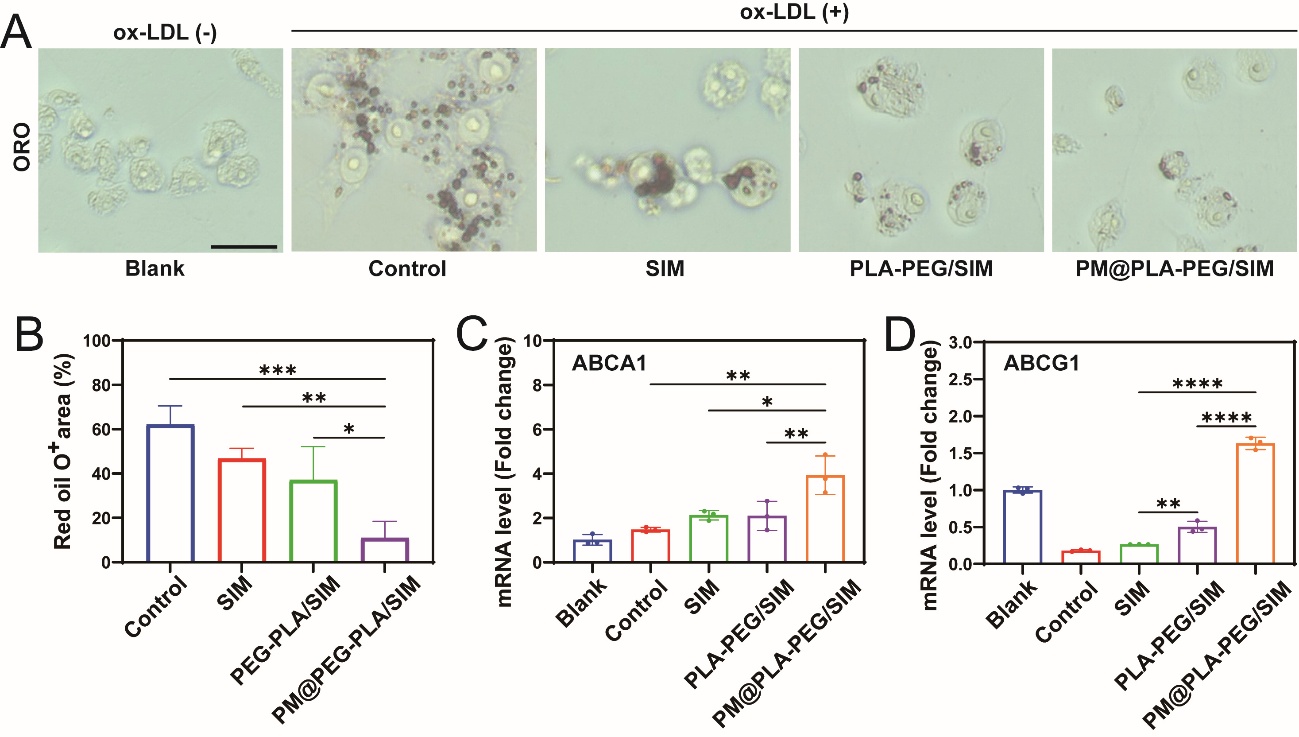


Figure S6 (**A**) Optical microscope images of representative ORO staining of ox-LDL-induced foam cells treated with different formulations. Scale bar, 50 μm. (**B**) Oil red o area quantification. (**C-D**) Cells were treated with SIM, PLA-PEG/SIM, or PM@PLA-PEG/SIM following OX-LDL stimulation. QRT-PCR analysis of cholesterol transport protein mRNA expression levels: ABCA1 and ABCG1. Data represent mean ± SD (n = 3, *P < 0.05, **P < 0.01, ***P < 0.001, ****P < 0.0001).


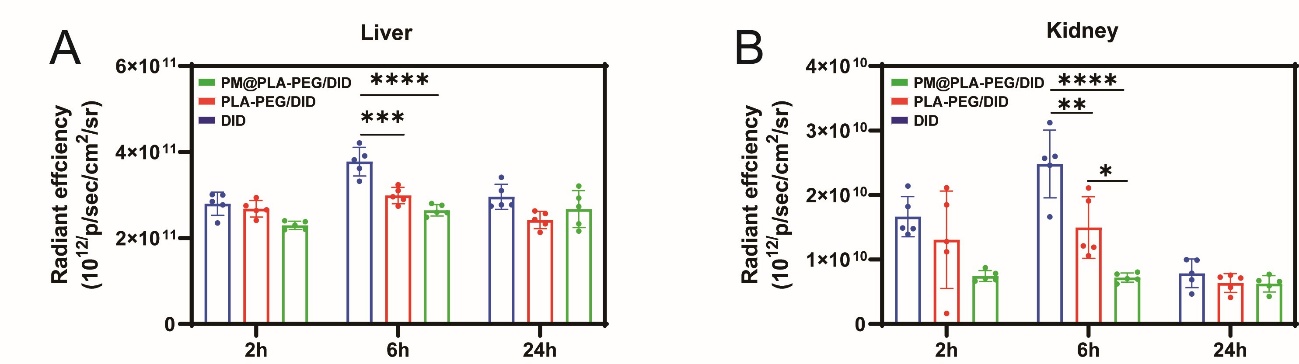


Figure S7 In vivo fluorescence statistics. (**A-B**) Quantitative liver and kidney Fluorescence intensity analysis in DID, PLA-PEG/DID, and PM@PLA-PEG/DID groups at different time points. Data were presented as mean ± SD (n = 5, *P < 0.05, **P < 0.01, ***P < 0.001, ****P < 0.0001).


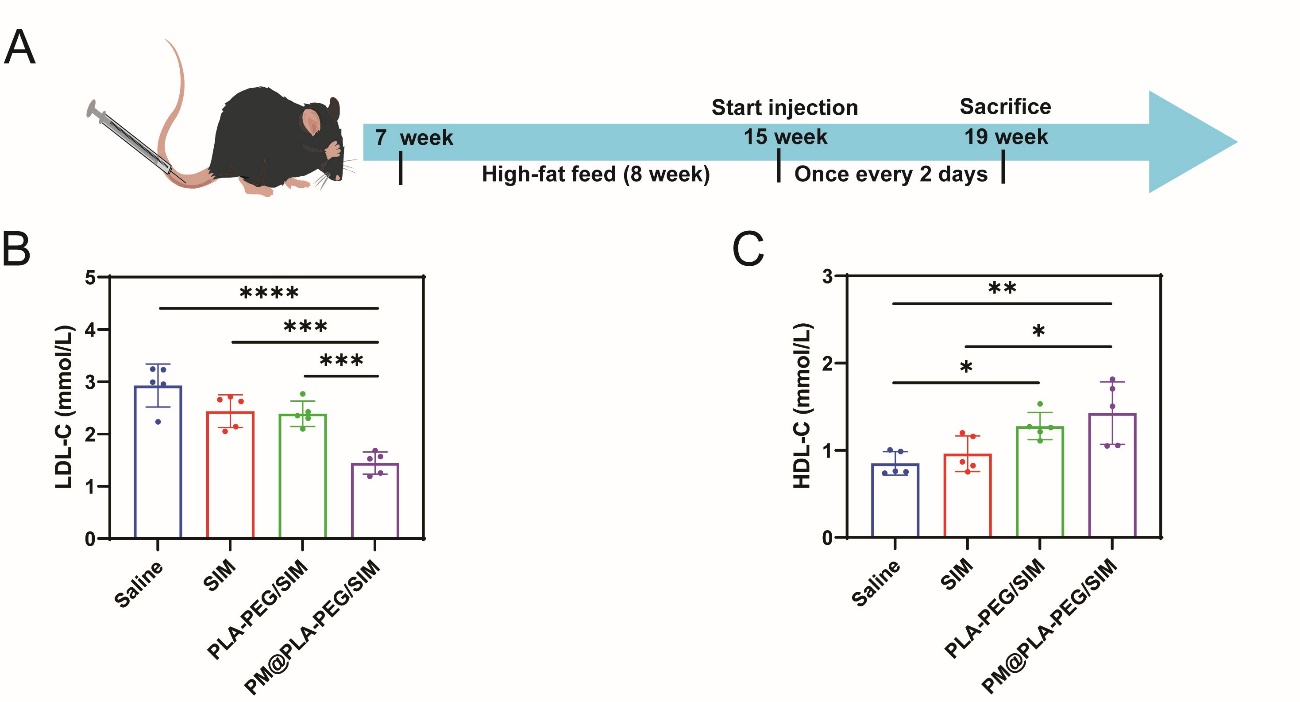


Figure S8(**A**) Schematic diagram of mice fed and injected with the preparation in the tail vein. After different treatments, Serum (**B**)LDL-C and (**C**)HDL-C levels in ApoE**-/-** mice. Data represent mean ± SD (n = 5, *P < 0.05, **P < 0.01, ***P < 0.001, ****P < 0.0001).
